# Supplementary material
Source: Springer Nature journal article supplement (https://www.springermedizin.de/resource/supplementary/12879_2012_2082_MOESM1_ESM.pdf/9443766)
Supplement: MOESM1 [file 9443766]

1176 titles and abstracts identified through 8 databases

1137 citations were excluded for:  
1122 not relevant to TNF- $\alpha$  and TB risk or duplicated studies  
3 abstracts  
10 reviews  
2 meta-analyses

33 full-texts retrieved for more detailed evaluation, 2 reviewers evaluated the study relevance

19 articles were excluded for not relevant to TNF-238G/A polymorphism and TB risk

14 case-control studies were identified

5 articles were excluded for:  
1 not enough useful information  
1 includes patients with pneumoconiosis  
3 not consistent to HWE in controls

9 articles were finally included
